RESEARCH ARTICLE

# Effects of Autumn and Spring Heat Waves on Seed Germination of High Mountain Plants

Simone Orsenigo<sup>1\*</sup>, Thomas Abeli<sup>1</sup>, Graziano Rossi<sup>1</sup>, Paolo Bonasoni<sup>2</sup>, Cristian Pasquaretta<sup>3</sup>, Maurizia Gandini<sup>4</sup>, Andrea Mondoni<sup>1</sup>

**1** Department of Earth and Environmental Sciences, University of Pavia, Pavia, Italy, **2** Institute of Atmospheric Sciences and Climate, Bologna, Italy, **3** Institut Pluridisciplinaire Hubert Curien, CNRS, Strasbourg, France, **4** MUSE—Science Museum, Trento, Italy

✉ Current Address: Department of Agricultural and Environmental Sciences—Production, Landscape, Agroenergy, University of Milan, Milano, Italy

\* [simone.orsenigo@unipv.it](mailto:simone.orsenigo@unipv.it)

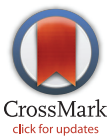

## Abstract

Alpine plants are considered to be particularly vulnerable to climate change and related extreme episodes, such as heat waves. Despite growing interest in the impact of heat waves on alpine plants, knowledge about their effects on regeneration is still fragmentary. Recruitment from seeds will be crucial for the successful migration and survival of these species and will play a key role in their future adaptation to climate change. In this study, we assessed the impacts of heat waves on the seed germination of 53 high mountain plants from the Northern Apennines (Italy). The seeds were exposed to laboratory simulations of three seasonal temperature treatments, derived from real data recorded at a meteorological station near the species growing site, which included two heat wave episodes that occurred both in spring 2003 and in autumn 2011. Moreover, to consider the effect of increasing drought conditions related to heat waves, seed germination was also investigated under four different water potentials. In the absence of heat waves, seed germination mainly occurred in spring, after seeds had experienced autumn and winter seasons. However, heat waves resulted in a significant increase of spring germination in c. 30% of the species and elicited autumn germination in 50%. When heat waves were coupled with drought, seed germination decreased in all species, but did not stop completely. Our results suggest that in the future, heat waves will affect the germination phenology of alpine plants, especially conditionally dormant and strictly cold-adapted chorotypes, by shifting the emergence time from spring to autumn and by increasing the proportion of emerged seedlings. The detrimental effects of heat waves on recruitment success is less likely to be due to the inhibition of seed germination *per se*, but rather due to seedling survival in seasons, and temperature and water conditions that they are not used to experiencing. Changes in the proportion and timing of emergence suggest that there may be major implications for future plant population size and structure.

## OPEN ACCESS

**Citation:** Orsenigo S, Abeli T, Rossi G, Bonasoni P, Pasquaretta C, Gandini M, et al. (2015) Effects of Autumn and Spring Heat Waves on Seed Germination of High Mountain Plants. PLoS ONE 10 (7): e0133626. doi:10.1371/journal.pone.0133626

**Editor:** Matthew Germino, US Geological Survey, UNITED STATES

**Received:** February 23, 2015

**Accepted:** June 30, 2015

**Published:** July 21, 2015

**Copyright:** © 2015 Orsenigo et al. This is an open access article distributed under the terms of the [Creative Commons Attribution License](https://creativecommons.org/licenses/by/4.0/), which permits unrestricted use, distribution, and reproduction in any medium, provided the original author and source are credited.

**Data Availability Statement:** All relevant data are within the paper and its Supporting Information files.

**Funding:** This work was carried out in the framework of SHARE project (Ev-K2-CNR, Bergamo), of the Italian Project of National Interest NextData, supported by the Ministry of Education, University and Research (MIUR), and of the project CLIMBIVEG, funded by the Provincia Autonoma di Trento, through the program "People" (Marie Curie Action – COFUND) within European Union's Seventh Framework Programme (FP7).

**Competing Interests:** The authors have declared that no competing interests exist.

## Introduction

Climate warming is one of the main drivers of future ecosystem changes [1]. Current knowledge about plant response to climate change is largely based on the effects of climatic trends, such as gradual warming. However, over the last twenty years, extreme weather events, such as heat waves, drought, late frost events and heavy and irregular rainfalls have increased in frequency and intensity [2,3,4,5], bringing about changes to ecosystems [6,7]. In this regard, heat waves (defined by the WMO World Meteorological Organization as a period in which the daily maximum temperature of more than five consecutive days exceeds the average maximum temperature by 5°C, the normal period being 1961–1990) are one of the most studied phenomena [8,9], having shown a significant increase in frequency and duration in the northern hemisphere [10,11,12]. Heat waves are known to have negative effects on plants, especially when they are associated with intense drought [13,14,15,16].

Recent climate change has already had an impact on biological systems worldwide, and mountain ecosystems are considered particularly susceptible [17,18]. In response to gradual warming, phenological shifts have already been observed in alpine plants [19], with expansion or compression of the reproductive period [20], thermophilization of communities [21], alteration of species composition, or species migration and extinction [22,23,24]. However, the effect of climate extremes in these environments is still unclear, as they have been shown to have both positive and negative impacts on plants [25]. For instance, heat waves can either have a direct impact on the reproductive performance of arctic-alpine species by reducing the number of flowers [26], or an indirect impact through advanced snowmelt, causing subsequent frost damage [27]. Conversely, heat waves may favour plant performance (in the absence of drought), by increasing photosynthetic activity [28] and overall plant fitness through acclimation to warmer conditions [29].

In the future, to cope with temperature increase and extreme events, alpine species will need to adapt or migrate [30]. As both adaptation and migration depend on the capacity of plant populations to regenerate from seeds, successful seedling recruitment will play a key role for species survival in warmer climates [31]. Temperature and water availability are the most important environmental variables that control seed germination and seedling survival [32], so understanding their effects on recruitment success will help to highlight mechanisms of plant adaptation. Indeed, the effects of climate change on plant regeneration from seeds have received increasing attention [31], and studies have been performed in the laboratory [33,34,35], in greenhouses [36] and in the field [37,38,39]. Despite this attention, little is known about the effects of heat waves on the seed germination of alpine plants. However, extreme heating and water evaporation may prevent and/or delay seed germination, which may subsequently affect seedling survival and plant fitness, and, in turn, lead to changes in local species dominance in alpine plant communities.

The present study investigated the effects of short-term heat events on the germination of alpine plants by exposing the seeds of 53 high mountain species that grow in the Northern Apennines (Italy) to different temperature treatments and water potentials in the lab, simulating heat waves that occurred in southern Europe in spring 2003 and autumn 2011. Our main research goals were to determine: 1) whether heat waves enhance and/or shift seed germination, 2) how seed germination is affected when heat waves are coupled with drought, 3) whether germination responses differ across species and seasons, and whether these potential differences are related to species biogeographic distribution.

## Material and Methods

### Study species

The study was performed in the laboratory; however, seed collection was planned according to protected areas legislation. The Appennino Tosco-Emiliano National Park and Frignano Regional Park (N-Italy) issued the permission for seed collection. Seeds were collected according to the ENSCONET Manual protocol, i.e. no more than 20% of the total mature seeds available were collected (at least 700 seeds per species) and the natural plant populations were respected. The study did not involve endangered or protected species. Seeds were collected at the time of natural dispersal [40] in August 2012 from 53 species that are representative of the habitats and plant communities that grow above the tree-line of the Northern Apennines (Table 1) [41]. This mountain range is characterised by low altitude mountains (few summits exceed 2000 m a.s.l.) and a large number of boreal and alpine plant species at the edge of their southern geographical distribution [42]. In order to investigate whether different geographical distribution influenced species response to heat waves, we grouped all the species according to their chorotype (Table 1). Chorotypes are distribution categories of a group of organisms with similar geographical distribution, regardless of their biogeographic regionalisation [43]; they are based on an analysis of the distribution of species with the goal of determining patterns of distribution. A total of seven chorotypes were distinguished according to Alessandrini *et al.* [42]. To facilitate reading, each species will hereafter be referred to by its genus name, except for those belonging to the same genus, where the full name will be given. For each species, we used seeds from a single population, randomly collected from at least 100 individuals. The species were mainly collected at Mt. Cimone (44 19.3'N; 10 70.0'E; 2165 m a.s.l.), the highest peak of the Northern Apennines, and at the nearby peaks of Mt. Rondinaio (44 11.4'N; 10 59.7'E; 1964 m a.s.l.) and Mt. Giovo (44 13.1'N; 10 57.7'E; 1991 m a.s.l.). In order to include a wide representativeness of native flora, some species were also collected a few kilometers away in the areas of Mt. Libro Aperto (44 09.4'N; 10 42.7'E; 1937 m a.s.l.), Mt. Cusna (44 16.6'N; 10 24.5'E; 2070 m a.s.l.) and Mt. Prado (44 25.0'N; 10 40.7'E; 2054 m a.s.l.) (Table 1). All the peaks included in the study spanned an area of approximately 150 km<sup>2</sup>. Distances between seed collection sites and the automatic weather station ranged from a few meters to 27 km in Mt. Cusna. Immediately after harvesting the seeds, they were taken to laboratories at the University of Pavia, cleaned and sown on agar to test germination.

### Germination phenology under simulated weekly temperatures

Laboratory treatments involved sowing three replicates of 30 seeds per species for each of the three temperature treatments described below on 1% distilled water-agar held in 90 mm diameter Petri dishes. Treatments were carried out in temperature and light-controlled incubators (LMS Ltd, Sevenoaks, UK) using a 12-h daily photoperiod. Light was provided by cool white fluorescent tubes, with a photosynthetically active radiation of 40–55  $\mu\text{mol m}^{-2} \text{s}^{-1}$  (400–700 nm).

From the time of collection (mid-August), seeds were exposed to three temperature treatments: BASE, i.e. mean weekly changes that were recorded at the species growing site between 1999 and 2011; HW1, i.e. a simulation of heat waves that occurred between 20<sup>th</sup> and 30<sup>th</sup> August 2011 and between 8<sup>th</sup> and 18<sup>th</sup> September 2011 (hereafter referred to as autumn heat waves); and HW2, i.e. a simulation of heat waves that occurred between 7<sup>th</sup> and 26<sup>th</sup> June 2003 and between 8<sup>th</sup> and 14<sup>th</sup> August 2003 (hereafter referred to as spring heat waves) (Table 2; Fig 1). Each treatment derived from air temperature measurements that were taken at 2m above ground, at hourly intervals, between 1999 and 2011, by the Italian Climate Observatory

**Table 1. List of species used in the experiment.** Nomenclature follows Conti *et al.* 2005 [64] and Peruzzi *et al.* 2010 [65] and successive updates.

| Family          | Species                                                                                                    | Chorotype          | Collection site  | Elevation (m a.s.l.) |
|-----------------|------------------------------------------------------------------------------------------------------------|--------------------|------------------|----------------------|
| Amaryllidaceae  | <i>Allium schoenoprasum</i> L.                                                                             | Circumboreal       | Mt. Rondinaio    | 1775                 |
| Ranunculaceae   | <i>Anemonastrum narcissiflorum</i> (L.) Holub                                                              | Circumboreal       | Mt. Rondinaio    | 1775                 |
| Asteraceae      | <i>Antennaria dioica</i> (L.) Gaertn.                                                                      | Circumboreal       | Mt. Cimone       | 1895                 |
| Poaceae         | <i>Anthoxanthum alpinum</i> Á.Löve & D.Löve                                                                | Arctic-Alpine      | Mt. Cimone       | 1875                 |
| Plumbaginaceae  | <i>Armeria marginata</i> (Levier) Bianchini                                                                | Endemic            | Mt. Cimone       | 1950                 |
| Asteraceae      | <i>Aster alpinus</i> L.                                                                                    | Arctic-Alpine      | Mt. Cimone       | 2110                 |
| Poaceae         | <i>Brachypodium genuense</i> (DC.) Roem. & Schult.                                                         | Endemic            | Mt. Cimone       | 1875                 |
| Asteraceae      | <i>Carduus defloratus</i> subsp. <i>carlinifolius</i> (Lam.) Ces. (= <i>Carduus carlinifolius</i> Lam.)    | Orophitic-European | Mt. Cimone       | 1875                 |
| Cyperaceae      | <i>Carex foetida</i> All.                                                                                  | Orophitic-European | Mt. Cusna        | 2050                 |
| Asteraceae      | <i>Centaurea nervosa</i> Willd.                                                                            | Orophitic-European | Mt. Cimone       | 1875                 |
| Asteraceae      | <i>Cirsium bertolonii</i> Spreng.                                                                          | Endemic            | Mt. Cimone       | 1875                 |
| Poaceae         | <i>Deschampsia cespitosa</i> (L.) P.Beauv subsp. <i>cespitosa</i>                                          | Subcosmopolitan    | Mt. Cimone       | 1875                 |
| Caryophyllaceae | <i>Dianthus deltoides</i> L.                                                                               | Eurasiatic         | Mt. Cimone       | 1875                 |
| Ericaceae       | <i>Empetrum hermaphroditum</i> Hagerup                                                                     | Circumboreal       | Mt. Prado        | 1900                 |
| Cyperaceae      | <i>Eriophorum angustifolium</i> Honck.                                                                     | Circumboreal       | Mt. Rondinaio    | 1600                 |
| Cyperaceae      | <i>Eriophorum latifolium</i> Hoppe                                                                         | Eurasiatic         | Mt. Rondinaio    | 1600                 |
| Poaceae         | <i>Festuca alfrediana</i> Foggi & Signorini                                                                | Orophitic-European | Mt. Cimone       | 2030                 |
| Poaceae         | <i>Festuca rubra</i> subsp. <i>commutata</i> (Gaudin) Markgr.-Dann. (= <i>Festuca nigrescens</i> Lam.)     | Circumboreal       | Mt. Cimone       | 1875                 |
| Poaceae         | <i>Patzkea paniculata</i> (L.) G.H.Loos (= <i>Festuca paniculata</i> (L.) Schinz & Thell)                  | Orophitic-European | Mt. Giovo        | 1740                 |
| Poaceae         | <i>Festuca riccerii</i> Foggi & Graz.Rossi                                                                 | Endemic            | Mt. Cimone       | 1875                 |
| Poaceae         | <i>Festuca violacea</i> Schleich. ex Gaudin subsp. <i>puccinelli</i> (Parl.) Foggi, Graz.Rossi & Signorini | Endemic            | Mt. Cimone       | 2030                 |
| Fabaceae        | <i>Genista radiata</i> (L.) Scop.                                                                          | Orophitic-European | Mt. Cimone       | 1875                 |
| Gentianaceae    | <i>Gentiana kochiana</i> E.P.Perrier & Sonegon                                                             | Orophitic-European | Mt. Cimone       | 1875                 |
| Gentianaceae    | <i>Gentiana purpurea</i> L.                                                                                | Orophitic-European | Mt. Cimone       | 1960                 |
| Geraniaceae     | <i>Geranium argenteum</i> L.                                                                               | Orophitic-European | Mt. Cimone       | 2110                 |
| Rosaceae        | <i>Geum montanum</i> L.                                                                                    | Orophitic-European | Mt. Cimone       | 1875                 |
| Asteraceae      | <i>Gnaphalium supinum</i> L.                                                                               | Circumboreal       | Mt. Rondinaio    | 1885                 |
| Asteraceae      | <i>Homogyne alpina</i> (L.) Cass.                                                                          | Orophitic-European | Mt. Cimone       | 1875                 |
| Hypericaceae    | <i>Hypericum richeri</i> Vill. subsp. <i>richeri</i>                                                       | Orophitic-European | Mt. Cimone       | 1960                 |
| Juncaceae       | <i>Juncus alpinoarticulatus</i> Chaix subsp. <i>alpinoarticulatus</i>                                      | Circumboreal       | Mt. Cimone       | 1875                 |
| Juncaceae       | <i>Juncus filiformis</i> L.                                                                                | Circumboreal       | Mt. Cimone       | 1875                 |
| Juncaceae       | <i>Juncus trifidus</i> L.                                                                                  | Circumboreal       | Mt. Libro Aperto | 1925                 |
| Juncaceae       | <i>Luzula alpinopilosa</i> (Chaix) Breistr. subsp. <i>alpinopilosa</i>                                     | Circumboreal       | Mt. Cimone       | 2110                 |
| Juncaceae       | <i>Luzula lutea</i> (All.) DC.                                                                             | Orophitic-European | Mt. Cimone       | 1950                 |

(Continued)

Table 1. (Continued)

| Family          | Species                                                                                                             | Chorotype          | Collection site | Elevation (m a. s.l.) |
|-----------------|---------------------------------------------------------------------------------------------------------------------|--------------------|-----------------|-----------------------|
| Juncaceae       | <i>Luzula multiflora</i> (Ehrh.) Lej. subsp. <i>multiflora</i>                                                      | Circumboreal       | Mt. Cimone      | 1875                  |
| Juncaceae       | <i>Luzula spicata</i> (L.) DC. subsp. <i>spicata</i>                                                                | Orophitic-European | Mt. Cimone      | 1895                  |
| Poaceae         | <i>Nardus stricta</i> L.                                                                                            | Eurosiberian       | Mt. Lagoni      | 1950                  |
| Poaceae         | <i>Phleum alpinum</i> L.                                                                                            | Orophitic-European | Mt. Cimone      | 1850                  |
| Plantaginaceae  | <i>Plantago alpina</i> L. subsp. <i>alpina</i>                                                                      | Orophitic-European | Mt. Cimone      | 1875                  |
| Ranunculaceae   | <i>Pulsatilla alpina</i> (L.) Delarbre subsp. <i>millefoliata</i> (Bertol.) D.M. Moser                              | Eurosiberian       | Mt. Rondinaio   | 1885                  |
| Polygonaceae    | <i>Rumex scutatus</i> L. subsp. <i>scutatus</i>                                                                     | Eurosiberian       | Mt. Cimone      | 1950                  |
| Rosaceae        | <i>Sanguisorba officinalis</i> L.                                                                                   | Circumboreal       | Mt. Cimone      | 1875                  |
| Saxifragaceae   | <i>Saxifraga exarata</i> Vill. subsp. <i>moschata</i> (Wulfen) Cavill.                                              | Orophitic-European | Mt. Cimone      | 2110                  |
| Saxifragaceae   | <i>Saxifraga oppositifolia</i> L. subsp. <i>oppositifolia</i>                                                       | Circumboreal       | Mt. Cimone      | 2110                  |
| Saxifragaceae   | <i>Saxifraga paniculata</i> Mill.                                                                                   | Circumboreal       | Mt. Cimone      | 1950                  |
| Caprifoliaceae  | <i>Scabiosa lucida</i> Vill.                                                                                        | Orophitic-European | Mt. Cimone      | 2110                  |
| Crassulaceae    | <i>Sempervivum montanum</i> L. subsp. <i>montanum</i>                                                               | Orophitic-European | Mt. Cimone      | 1970                  |
| Caryophyllaceae | <i>Silene acaulis</i> subsp. <i>bryoides</i> (Jord.) Nyman                                                          | Circumboreal       | Mt. Cimone      | 2030                  |
| Caryophyllaceae | <i>Silene suecica</i> (Lodd.) Greuter & Burdet                                                                      | Circumboreal       | Mt. Prado       | 2035                  |
| Asteraceae      | <i>Solidago virgaurea</i> subsp. <i>minuta</i> (L.) Arcang.                                                         | Eurosiberian       | Mt. Cimone      | 1875                  |
| Fabaceae        | <i>Trifolium alpinum</i> L.                                                                                         | Orophitic-European | Mt. Cimone      | 1895                  |
| Ericaceae       | <i>Vaccinium uliginosum</i> L. subsp. <i>microphyllum</i> (Lange) Tolm. (= <i>Vaccinium gaultherioides</i> Bigelow) | Circumboreal       | Mt. Cimone      | 1875                  |
| Ericaceae       | <i>Vaccinium myrtillus</i> L.                                                                                       | Circumboreal       | Mt. Cimone      | 1875                  |

Information on species chorotype was adapted from Alessandrini *et al.* 2003 [42]. For each species we reported the site and the elevation of the collected population.

doi:10.1371/journal.pone.0133626.t001

Table 2. Temperatures during the different days of the incubation treatments and the equivalent week (w.) of the year. The two HW treatments are highlighted in bold.

| Day of the experiments | Equivalent time of the year                        | Temperature treatments (°C) |             |             |
|------------------------|----------------------------------------------------|-----------------------------|-------------|-------------|
|                        |                                                    | BASE                        | HW 1        | HW 2        |
| 1–6                    | 3 <sup>rd</sup> w. August                          | 11°C                        | 11°C        | 11°C        |
| 7–17                   | 4 <sup>th</sup> w. August                          | 11°C                        | <b>17°C</b> | 11°C        |
| 18–25                  | 1 <sup>st</sup> w. September                       | 7°C                         | 7°C         | 7°C         |
| 26–36                  | 2 <sup>nd</sup> -3 <sup>rd</sup> w. September      | 7°C                         | <b>13°C</b> | 7°C         |
| 37–42                  | 4 <sup>th</sup> w. September                       | 7°C                         | 7°C         | 7°C         |
| 43–53                  | 1 <sup>st</sup> w. October                         | 5°C                         | 5°C         | 5°C         |
| 54–258                 | 2 <sup>nd</sup> w. October- 4 <sup>th</sup> w. May | 0°C                         | 0°C         | 0°C         |
| 259–305                | 1 <sup>st</sup> w. June                            | 9°C                         | 9°C         | 9°C         |
| 306–326                | 2 <sup>nd</sup> -4 <sup>th</sup> w. June           | 9°C                         | 9°C         | <b>15°C</b> |
| 327–360                | 1 <sup>st</sup> w. July-1 <sup>st</sup> w. August  | 11°C                        | 11°C        | 11°C        |
| 361–367                | 2 <sup>nd</sup> w. August                          | 11°C                        | 11°C        | <b>19°C</b> |

doi:10.1371/journal.pone.0133626.t002

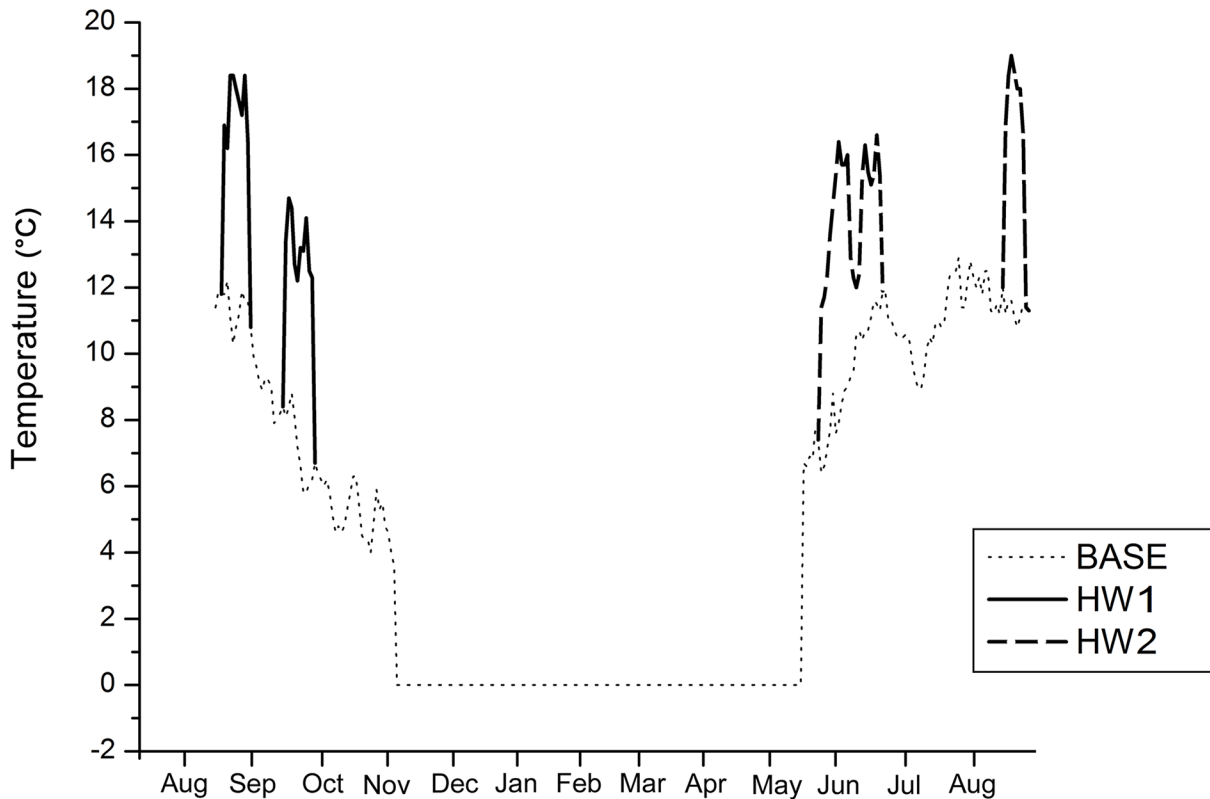

**Fig 1.** Mean daily air temperatures (°C) at the site where most of the species were collected (Monte Cimone; dot line) in the period 1999–2011, and the two heat wave episodes that occurred in autumn 2011 (HW1; continuous line) and spring 2003 (HW2; dashed line).

doi:10.1371/journal.pone.0133626.g001

“Ottavio Vittori” (ICO-OV), managed by ISAC-CNR (Bologna) (Fig 1) and located near the species growing site on the top of Mt. Cimone. ICO-OV is part of the Global Atmospheric Watch (GAW) programme by the World Meteorological Organization (WMO) and SHARE (Station at High Altitude for Research on the Environment) project. Data from this station were chosen because they represented the most reliable temperature measurements available (i.e. a complete 12-year series) close to the species growing site. As an incubation temperature, we used constant mean day (8am–8pm) and night (8pm–8am) temperatures, because of the subtle temperature differences (i.e. <5°C) between day and night recorded during heat waves. Furthermore, in order to simulate the insulating effects of snow cover, winter temperatures were kept at a constant 0°C for 7 months (according to the climatic data from ICO-OV), in complete darkness (from mid-October to the end of May). Darkness prevents germination, at least in positive photoblastic species (e.g. *Luzula alpinopilosa*), although the light requirement of most of the species is unknown. Seeds were regularly checked for germination at 5-day intervals.

### Water potential

Laboratory germination tests at different water potentials were set up to simulate decreasing soil water availabilities that could be related to HW1. HW2 was not included in these experiments, since it occurred a few days after snowmelt, when soil moisture was high. Seeds belonging to 10 previously tested species, which showed an increase in germination during autumn heat waves (HW1) under full hydration (i.e. 0 MPa), were subjected to water potentials of

approx. -0.1, -0.2, -0.4 and -0.8 MPa and then exposed to BASE and HW1 temperature treatments. In each case, seeds were sown on filter papers soaked in a solution of polyethylene glycol 6000 (PEG) (Alfa Aesar GmbH & Co KG, Germany), at a concentration appropriate to the intended treatment [44]. A small portion of solution (3 ml) was added to the filter papers every time germination was monitored, to avoid changes in concentration due to solution evaporation. For each test, the number of seeds and replications, light conditions and observations were as described above.

## Data analysis

Species with a germination percentage lower than 5% in all temperature treatments were excluded from statistical analysis ( $n = 5$ ). All analyses were carried out using the R software (version 3.1.1) [45]. We estimated success of seed germination during autumn, summer and at the end of each treatment using three generalized linear mixed effect models (GLMMs) for binary data with binomial error distribution. Treatments (BASE, HW1 and HW2) were used as fixed effects, while replicates and species identity were included as random effects in each model. We performed a post-hoc multiple comparison between fixed effects using the “glht” function in the “multcomp” package in R [46], computing the Tukey's honest significance test. We also used generalized linear models (GLM) for binary data with binomial error distribution to estimate the variation between treatments occurring for each tested species ( $n = 48$ ), computing the Tukey's honest significance test.

The same GLMM, GLM and multiple comparison described above were applied to estimate seed germination at different treatments and at different water potentials, both at global and species level, respectively. We used GLM to estimate the success of germination at the three different treatments for each chorotype class. We finally performed a chi-square test for each species separately to compare the number of seeds that germinated in autumn between BASE and HW1 conditions.

## Results

### Effects of autumn heat waves on germination phenology

Germination response just after seed dispersal in late-summer/autumn (16<sup>th</sup> August-10<sup>th</sup> October, Table 2) varied across species and temperature treatments (Figs 2 and 3 and S1 Table) and occurred within the first month after sowing. In particular, in the absence of heat waves (BASE, Table 2), seed germination was low (0–25%) across most of the species, with only eight species showing more than 30% germination (see Figs 2 and 3 and S1 Table). However, the increase in autumn temperatures according to the HW1 scenario (Table 2) elicited a significant increase in germination in 23 of the 48 species included in the analysis (Figs 2 and 3 and S1 Table). In some species, germination more than doubled: *Antennaria* (from 47% to 98%), *Aster* (from 47% to 96%), *Carduus* (from 23% to 47%), *Centaurea* (from 3% to 44%), *Festuca rubra* (from 30% to 90%), *Geranium* (from 10% to 52%), *Gnaphalium* (from 1% to 26%), *Hypericum* (from 13% to 67%), *Luzula multiflora* (from 10% to 52%), *Plantago* (from 3% to 41%), *Scabiosa* (from 17% to 44%); *Silene acaulis* (from 3% to 31%), *Silene suecica* (from 1 to 49%), *Solidago* (from 5% to 53%) and *Vaccinium myrtillus* (from 0 to 51%). However, only a moderate increase in the germination percentage was observed in other species (see S1 Table). When seeds were transferred to the winter temperature (0°C), germination stopped in each of the tested treatments. Germination resumed when seeds were transferred to spring conditions, showing significant differences between BASE and HW1 (Table 3). In particular, summer germination increased significantly for seeds experiencing HW1 in eight species, but it reduced in another five species (S1 Table). Considering the germination at the end of each treatment (i.e.

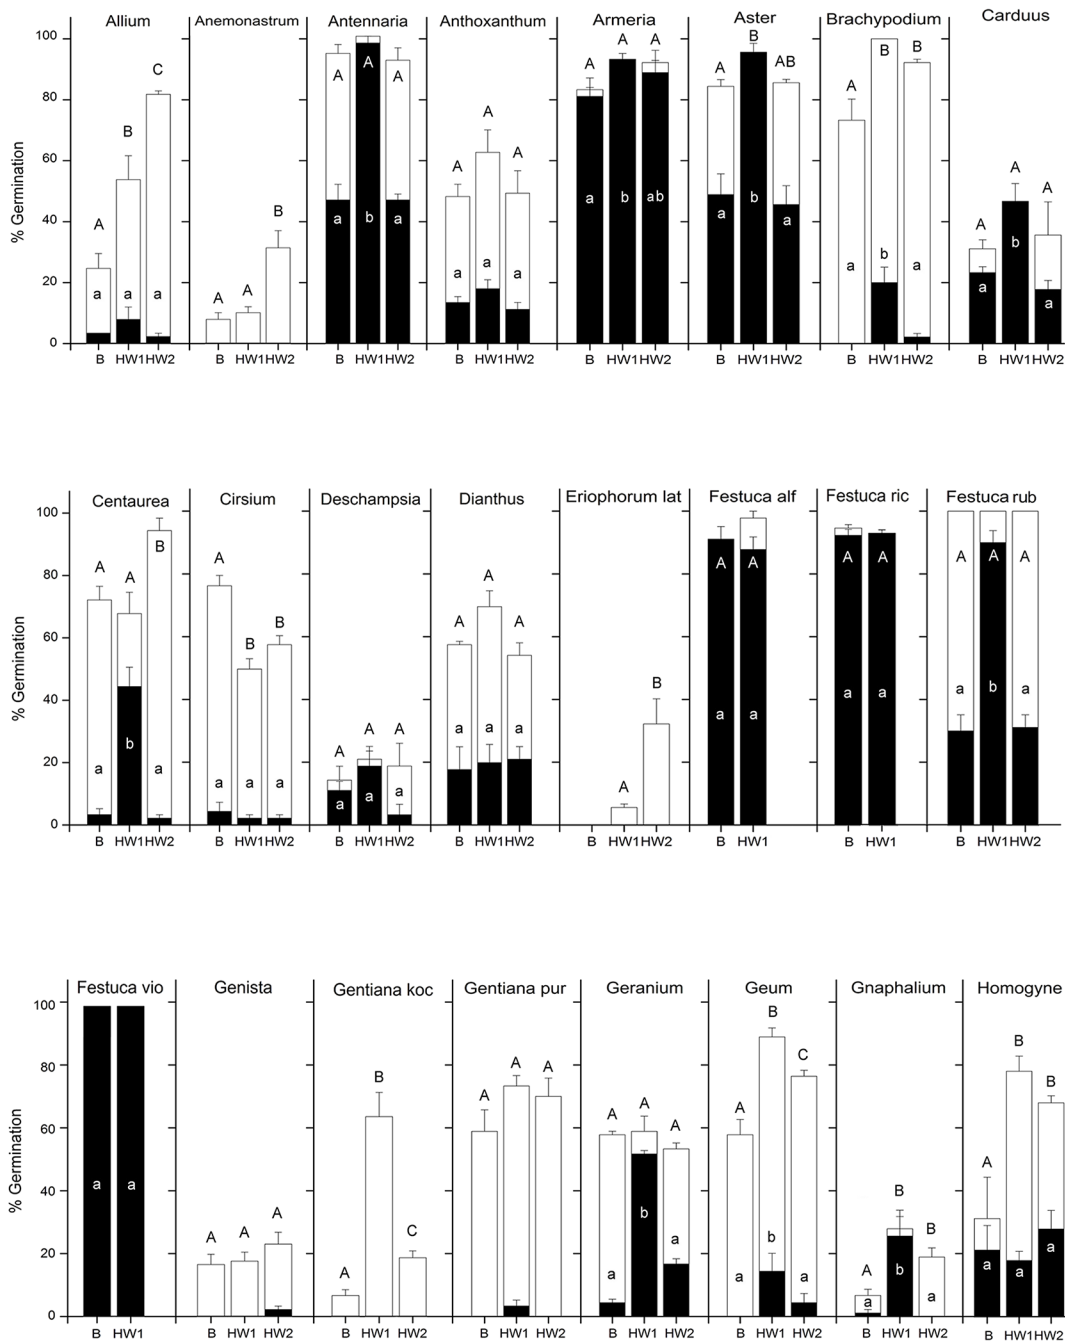

**Fig 2. Cumulative germination percentage (means  $\pm$  s.e.) of each species (*Allium-Homogyne*) under three temperature treatments at the end of autumn (black columns) and at the end of summer (white columns).** Winter germination is not shown since no seeds germinate during cold stratification period. Final germination is given by the sum of black and white. Lowercase letters indicate significant differences of germination at  $P < 0.05$  level (Tukey's honest significance test) in autumn. Capital letters indicate significant differences of final germination at  $P < 0.05$  level (Tukey's honest significance test) (i.e. sum of autumn and spring/summer germination).

doi:10.1371/journal.pone.0133626.g002

the sum of summer/autumn and spring/summer emergence), there were significant differences between BASE and HW1 (Table 3), with the latter resulting in a significant increase of germination in 12 species and a significant decrease in two species (Figs 2 and 3 and S1 Table).



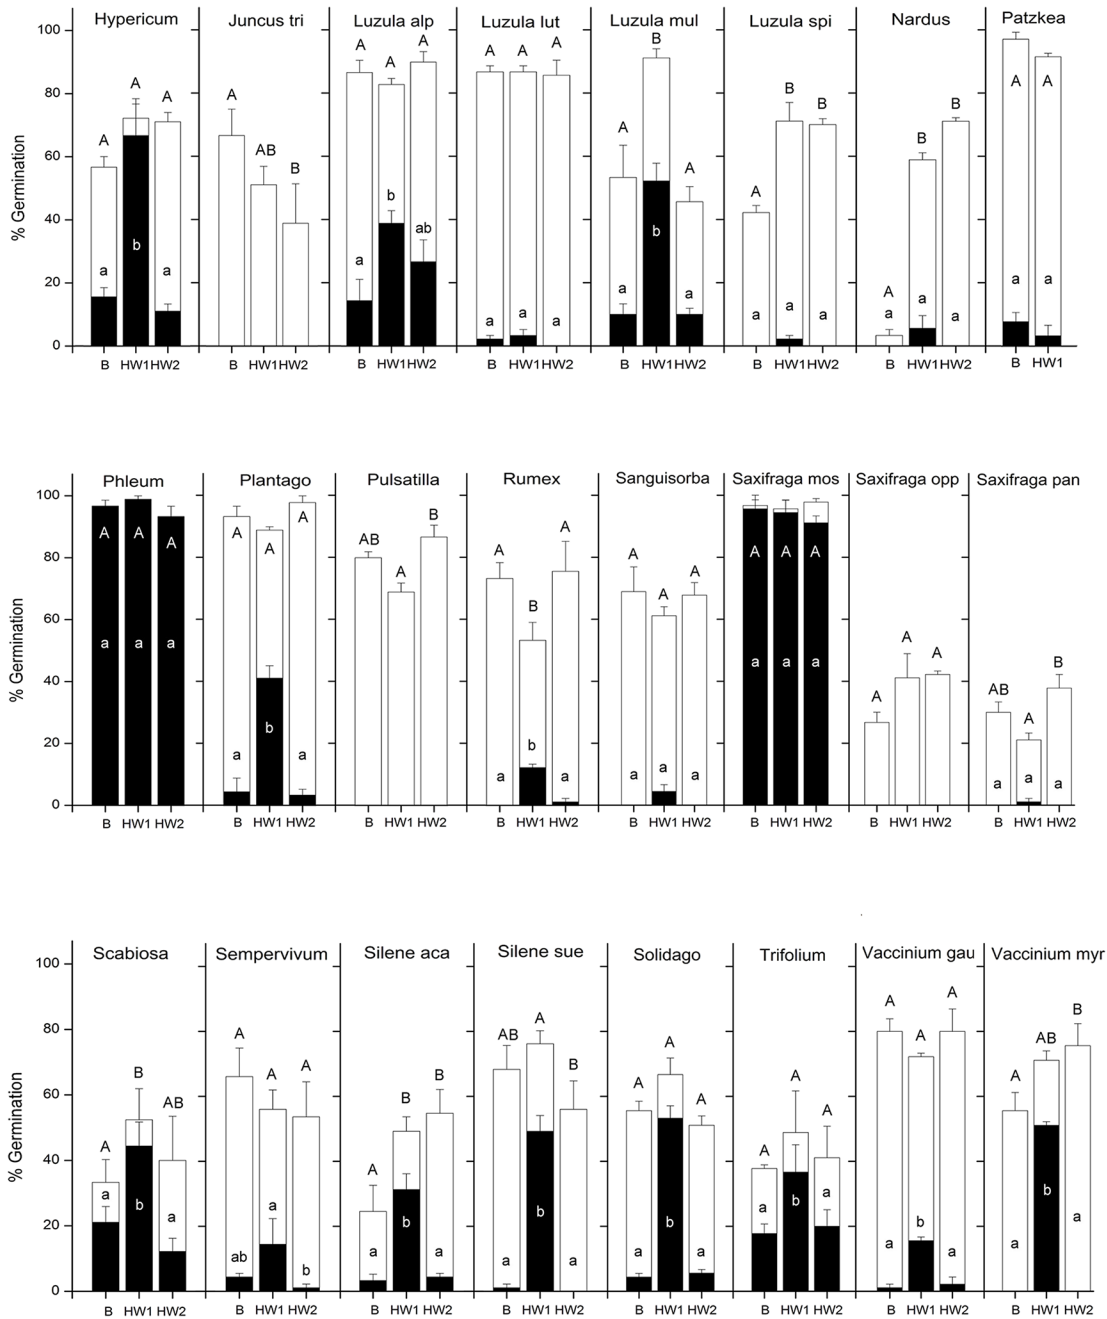

**Fig 3. Cumulative germination percentage (means  $\pm$  s.e.) of each species (*Hypericum-Vaccinium myr*) under three temperature treatments at the end of autumn (black columns) and at the end of summer (white columns). Winter germination is not shown since no seeds germinate during cold stratification period. Final germination is given by the sum of black and white. Lowercase letters indicate significant differences of germination at P<0.05 level (Tukey's honest significance test) in autumn. Capital letters indicate significant differences of final germination at P<0.05 level (Tukey's honest significance test) (i.e. sum of autumn and spring/summer germination).**

doi:10.1371/journal.pone.0133626.g003

### Effects of spring heat waves on germination phenology

In four species, the effects of spring heat waves (Table 2) was not tested because more than 90% of seeds germinated in autumn at the BASE temperature treatment (*Festuca alfrediana*, *F. riccerii* and *F. violacea*), or because only a few seeds were available (*Patzkea paniculata*). In

**Table 3. Results of the generalized linear mixed effects models (GLMMs) on the effects of treatments (HW1, HW2 and B) on autumn, summer and final seed germination.**

| Treatment | Germination AUTUMN |         |         |         | Germination SUMMER |         |         |         | Germination FINAL |         |         |         |
|-----------|--------------------|---------|---------|---------|--------------------|---------|---------|---------|-------------------|---------|---------|---------|
|           | Estimate           | Std.Err | Z-value | P-value | Estimate           | Std.Err | Z-value | P-value | Estimate          | Std.Err | Z-value | P-value |
| HW1×B     | 1.699              | 0.077   | 21.855  | <0.001  | 0.169              | 0.058   | 2.879   | 0.011   | 0.538             | 0.053   | 10.141  | <0.001  |
| HW2×B     | -0.069             | 0.086   | -0.805  | 0.699   | 0.548              | 0.056   | 9.767   | <0.001  | 0.474             | 0.053   | 8.909   | <0.001  |
| HW1×HW2   | 1.769              | 0.080   | 22.108  | <0.001  | -0.379             | 0.059   | -6.372  | <0.001  | 0.063             | 0.053   | 1.185   | 0.462   |

doi:10.1371/journal.pone.0133626.t003

general, significant differences in summer germination were observed between BASE and HW2 temperature treatments (Table 3). Germination occurred within the first month after winter stratification and increased significantly in 15 species experiencing HW2, compared to those under BASE treatment, but it reduced in two species (S1 Table). Considering the final germination (i.e. sum of summer/autumn and spring/summer emergence), there were significant differences between BASE and HW2 (Table 3), with germination increasing significantly in HW2 compared to BASE in 10 species (Figs 2 and 3 and S1 Table).

Comparing summer germination in HW1 and HW2, significant differences were also reported (Table 3). Summer germination increased significantly in HW2 compared to HW1 in 14 species, but the opposite was observed in four species (Figs 2 and 3 and S1 Table).

There were no significant differences in final germination between HW1 and HW2 (Table 3). However, considering the single-species models, final germination was higher in HW2 in seven species compared to HW1, while the opposite was observed in four species (Figs 2 and 3 and S1 Table).

### Germination at different water potentials in autumn

Seeds of the 10 species that showed a significant germination response to autumn heat waves (HW1) were further exposed to different water potentials. Despite the large inter-species variation, seed germination decreased with decreasing water potential, both in HW1 and in BASE temperature treatments (Table 4 and Fig 4). However, in three species (*Aster*, *Festuca rubra* and *Hypericum*) more than 50% of seeds were able to germinate under HW1 even at -0.8 MPa. Furthermore, in six species (*Aster*, *Festuca rubra*, *Hypericum*, *Luzula alpinopilosa*, *Luzula multiflora* and *Vaccinium myrtillus*) seed germination under HW1 at -0.4 MPa was higher than 70% (Table 5 and Fig 4).

### Germination response in different chorotypes

Autumn germination under HW1 increased significantly compared to BASE in Arctic-alpine, Circumboreal, Eurosiberian and Orophitic-European species (Table 6). In Endemic species, the differences were just below the threshold of significance, whilst in Eurasiatic and Subcosmopolitan species there were no significant differences between HW1 and BASE (Table 6). Summer germination increased significantly in HW1 compared to BASE in Orophitic-

**Table 4. Results of the generalized linear mixed effects models (GLMMs) on the effect of water potentials (WP) and treatment on seed germination.**

|              | Estimate | Std. Error | Z-value | Df | P-value |
|--------------|----------|------------|---------|----|---------|
| Treatment    | 2.97081  | 0.13803    | 21.524  | 1  | <0.001  |
| WP           | -0.23185 | 0.03416    | -6.786  | 3  | <0.001  |
| Treatment×WP | -0.09485 | 0.04238    | -2.238  | 3  | 0.0252  |

doi:10.1371/journal.pone.0133626.t004

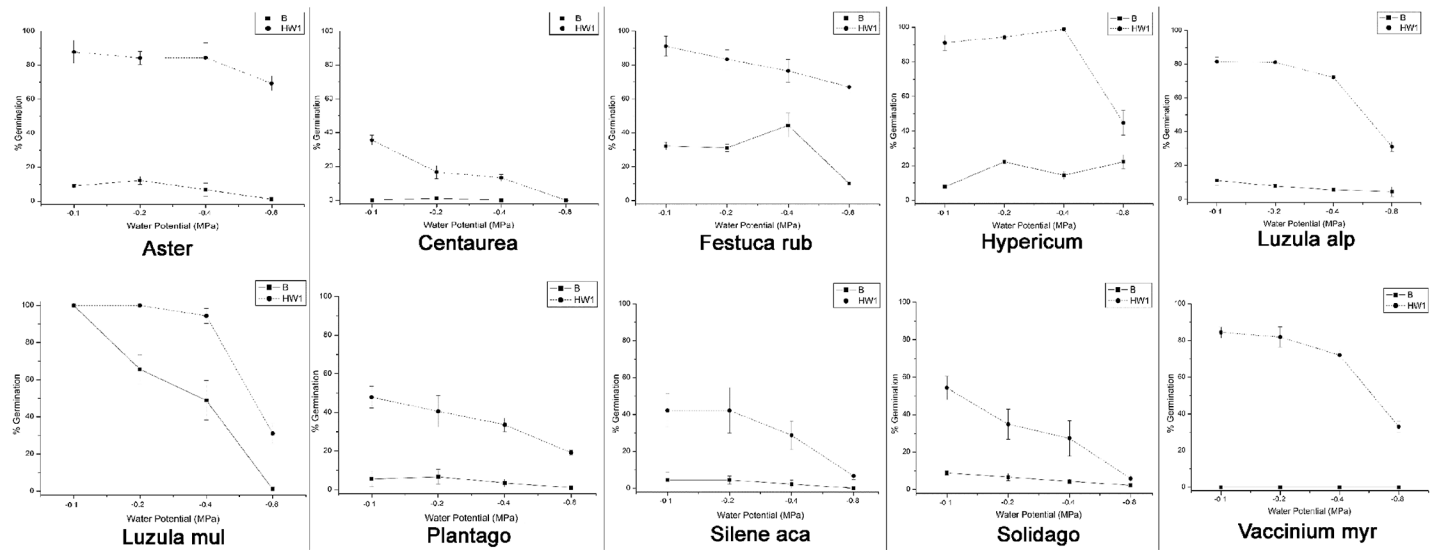

**Fig 4. Autumn germination percentage (means ± s.e.) of ten species at different water potentials (MPa) under BASE treatment (B) and autumn heat waves (HW1).**

doi:10.1371/journal.pone.0133626.g004

European species, while it decreased significantly in Circumboreal (Table 6). Final germination increased significantly in HW1 compared to BASE in Arctic-alpine, Circumboreal, Eurosiberian and Orophitic-European species (Table 6). Summer germination increased significantly

**Table 5. Results of the chi-square test for differences in germination at different water potentials within treatments.** Within each treatment the effect of four water potentials (-0.1 MPa, -0.2 MPa, -0.4 MPa, -0.8MPa) was tested.

| Species                                               | Treatments | Germination AUTUMN |        |         |
|-------------------------------------------------------|------------|--------------------|--------|---------|
|                                                       |            | Df                 | Chisq  | P-value |
| <i>Aster alpinus</i>                                  | Base       | 4                  | 67.310 | <0.001  |
|                                                       | HW1        | 4                  | 19.943 | <0.001  |
| <i>Centaurea nervosa</i>                              | Base       | 4                  | 0.9278 | 0.920   |
|                                                       | HW1        | 4                  | 28.131 | <0.001  |
| <i>Festuca nigrescens</i>                             | Base       | 4                  | 23.279 | <0.001  |
|                                                       | HW1        | 4                  | 21.857 | <0.001  |
| <i>Hypericum richeri</i> subsp. <i>richeri</i>        | Base       | 4                  | 9.053  | 0.059   |
|                                                       | HW1        | 4                  | 83.512 | <0.001  |
| <i>Luzula alpinopilosa</i> subsp. <i>alpinopilosa</i> | Base       | 4                  | 7.204  | 0.125   |
|                                                       | HW1        | 4                  | 76.594 | <0.001  |
| <i>Luzula multiflora</i> subsp. <i>multiflora</i>     | Base       | 4                  | 65.503 | <0.001  |
|                                                       | HW1        | 4                  | 69.774 | <0.001  |
| <i>Plantago alpina</i> subsp. <i>alpina</i>           | Base       | 4                  | 3.461  | 0.483   |
|                                                       | HW1        | 4                  | 16.872 | 0.004   |
| <i>Silene acaulis</i> subsp. <i>bryoides</i>          | Base       | 4                  | 0.442  | 0.978   |
|                                                       | HW1        | 4                  | 33.806 | <0.001  |
| <i>Solidago virgaurea</i> subsp. <i>minuta</i>        | Base       | 4                  | 4.211  | 0.378   |
|                                                       | HW1        | 4                  | 51.818 | <0.001  |
| <i>Vaccinium myrtillus</i>                            | Base       | 4                  | 0.000  | 1       |
|                                                       | HW1        | 4                  | 58.073 | <0.001  |

doi:10.1371/journal.pone.0133626.t005

**Table 6. Results of the generalized linear mixed effects models (GLMMs) on the effects on biogeographic distribution (chorology) on seed germination between control and heat waves treatments.**

| Chorotype          | Treatments | Germination AUTUMN |          |         |         | Germination SUMMER |          |         |         | Germination FINAL |          |         |         |
|--------------------|------------|--------------------|----------|---------|---------|--------------------|----------|---------|---------|-------------------|----------|---------|---------|
|                    |            | Estimate           | Std. Err | Z-value | P-value | Estimate           | Std. Err | Z-value | P-value | Estimate          | Std. Err | Z-value | P-value |
| Arctic-Alpine      | BxHW1      | 1.063              | 0.220    | 4.825   | <0.001  | 0.043              | 0.288    | 0.152   | 0.879   | 0.650             | 0.241    | 2.695   | 0.007   |
|                    | BxHW2      | -                  | -        | -       | -       | 0.138              | 0.251    | 0.550   | 0.582   | 0.050             | 0.223    | 0.224   | 0.823   |
| Circumboreal       | BxHW1      | 1.701              | 0.118    | 14.345  | <0.001  | -0.257             | 0.087    | -2.956  | 0.003   | 0.309             | 0.077    | 3.974   | <0.001  |
|                    | BxHW2      | -                  | -        | -       | -       | 0.326              | 0.080    | 4.046   | <0.001  | 0.322             | 0.077    | 4.130   | <0.001  |
| Endemic            | BxHW1      | 0.300              | 0.149    | 2.011   | 0.044   | -0.027             | 0.221    | -0.123  | 0.902   | 0.139             | 0.199    | 0.697   | 0.486   |
|                    | BxHW2      | -                  | -        | -       | -       | 0.200              | 0.222    | 0.898   | 0.369   | -0.098            | 0.206    | -0.475  | 0.635   |
| Eurasian           | BxHW1      | 0.130              | 0.361    | 0.360   | 0.719   | 0.426              | 0.252    | 1.689   | 0.091   | 0.374             | 0.224    | 1.670   | 0.094   |
|                    | BxHW2      | -                  | -        | -       | -       | 0.685              | 0.248    | 2.762   | 0.005   | 0.605             | 0.222    | 2.726   | 0.006   |
| Euro-siberia       | BxHW1      | 2.546              | 0.434    | 5.865   | <0.001  | 0.047              | 0.157    | 0.303   | 0.762   | 0.364             | 0.157    | 4.955   | 0.016   |
|                    | BxHW2      | -                  | -        | -       | -       | 0.775              | 0.157    | 4.919   | <0.001  | 0.778             | 0.151    | 2.409   | <0.001  |
| Orophitic-European | BxHW1      | 0.646              | 0.077    | 8.301   | <0.001  | 0.334              | 0.082    | 4.047   | <0.001  | 0.543             | 0.074    | 7.324   | <0.001  |
|                    | BxHW2      | -                  | -        | -       | -       | 0.326              | 0.079    | 4.091   | <0.001  | 0.197             | 0.073    | 2.682   | 0.007   |
| Subcosmopolitan    | BxHW1      | 0.622              | 0.430    | 1.446   | 0.148   | -0.324             | 0.927    | -0.350  | 0.726   | 0.460             | 0.395    | 1.164   | 0.244   |
|                    | BxHW2      | -                  | -        | -       | -       | 1.593              | 0.656    | 2.426   | 0.015   | 0.321             | 0.403    | 0.798   | 0.425   |

doi:10.1371/journal.pone.0133626.t006

once more in Euroasiatic, Circumboreal, Eurosiberian, Orophitic-European and Subcosmopolitan species in HW2 compared to BASE, while in Arctic-alpine and Endemic species there were no differences in summer germination between temperature treatments (Table 6). Final germination between BASE and HW2 was significantly different, with a general increase in the latter, for Circumboreal, Eurosiberian, Eurasian and Orophitic-European species (Table 6).

## Discussion

Although there have been previous studies on the effects of climate warming on seed germination in alpine species, they focused on continuous seasonal temperature warming [33,36,37,38] instead of short term heat waves. The results reported here show that in the absence of heat waves (i.e. the BASE treatment), seed germination mainly occurred in spring, after seeds had experienced late-summer, autumn and winter seasons. Indeed, seed germination in alpine plants tends to occur shortly after snowmelt in spring [47,48]. Conversely, in autumn, germination significantly increased after heat waves in half the species (23 out of 48), indicating that heat waves may affect the timing of germination. Supporting this view, Mondoni *et al.* [34] cautioned that warming may lead to a shift from mostly spring emergence to autumn emergence in several glacier foreland species, particularly among those with non-dormant or conditionally dormant seeds (*sensu* Baskin & Baskin, [32]). However, we observed that in some cases autumn heat waves had no impact or only a minor impact on germination in autumn (probably due to a deep dormancy state), but it significantly increased the subsequent summer germination, as shown in *Allium*, *Brachypodium*, *Gentiana kochiana*, *Geum*, *Homogyne*, *Luzula multiflora*, *Luzula spicata* and *Nardus*. On the other hand, autumn heat waves reduced summer germination in *Centaurea*, *Cirsium*, *Hypericum*, *Rumex* and *Solidago*. It is therefore not possible to generalize across species about the effects that autumn heat waves have on germination. Furthermore, even when autumn emergence is not affected (i.e. probably due to a deep dormancy state), potential changes in summer emergence cannot be ruled out.

We observed that when heat waves occurred just after snow melt, summer germination increased in 15 out of 48 species, confirming that high temperature *per se* may have positive effects on seed germination [33]. This finding is supported by the germination results observed at the end of the treatments (the sum of summer/autumn and spring/summer germination): there was a significant increase in seed germination in HW1 and HW2 compared to BASE, but there were no significant differences between HW1 and HW2. Although heat waves have been shown to have positive effects on seed germination *per se*, implications on subsequent seedling survival may depend on when these events occur. For example, spring heat waves may enhance seedling recruitment as the timing of emergence is similar to that experienced in the absence of heat waves (i.e. in spring after snow melt), but the proportion of the emerged seedlings is higher. However, the advanced snow melting and the depletion of soil moisture that are often associated to heat waves may result in a rapid die off of the seedlings [49]. Conversely, autumn heat waves could alter germination phenology by eliciting an anomalous germination immediately after seed dispersal, whose effects on seedling survival remains unknown.

Autumn emergence could have major implications for species that are currently adapted to emerge in spring [34]. In this regard, the phenology of germination of some *Festuca* species (Poaceae) suggests that seedling survival during winter is possible. Supporting this view, Marcante *et al.* [50] demonstrated that in some pioneer species, seedlings may exhibit a frost resistance ( $-5.6^{\circ}\text{C}$ ) in the field. Moreover, chances of seedling survival are also linked to air temperature and snow cover. Air temperatures during winter can drop below  $-15^{\circ}\text{C}$ , whilst the soil is usually covered by snow, which moderates temperatures at about  $0^{\circ}\text{C}$  [47]. However, future changes in snowfall and precipitation patterns that could reduce the duration and extent of snow cover [51] would alter the thermal protection of the snow-pack on seedlings [52], thus making them more susceptible to late spring or early summer frost events [53]. Although soil moisture depletion is generally rare in alpine environments [47], one of the possible consequences of heat waves is the decrease of water content of the near-surface soil [54], where seeds usually germinate. In our study, the seed germination of several species (*Hypericum*, *Luzula alpinopilosa*, *Luzula multiflora*, *Plantago*, *Silene acaulis*, *Solidago* and *Vaccinium myrtillus*) strongly reduced at low water potential ( $-0.8$  MPa, Fig 4), perhaps as a response to prevent germination in drying soils [55]. However, most species were able to germinate under conditions that represented moderate drought ( $-0.4$  MPa; Fig 4); furthermore, in two species (*Aster* and *Festuca rubra*) seed germination was higher than 70% even at the driest condition tested ( $-0.8$  MPa). Hence, when heat waves are associated with a decrease in soil moisture levels, we cannot rule out the possibility that some species may be able to germinate. Moreover, storms and rainfall can be frequent events, although they are stochastic in mountain areas, as reported for our study area in summer and autumn [56], providing a water supply for germination. Nevertheless, prolonged water stress may compromise seedling viability, since drought conditions usually exacerbate the negative effect of heat stress on plant growth [57]. Plant mortality in juvenile stages may result in negative impacts on the genetic variability of the populations, and this could have possible consequences on natural selection.

At plant family level, some of the *Poaceae* and *Juncaceae* showed similar germination regardless of treatment. Grasses are generally predicted to be favoured by climate change in arctic and alpine habitats [37,58], which is probably due to their increased heat tolerance in both adults [59] and seedlings [60]. Moreover, their higher tissue turnover and photosynthetic system enable them to respond more rapidly to environmental manipulations than other plant functional types [61,62]. If we consider seed germination, this hypothesis is partially confirmed by previous experiments [34] and by our results, which show that 4 out of 10 *Poaceae* tested adapted to autumn germination and more than half (12 out of 16) of the graminoids (*Poaceae*,

*Juncaceae* and *Cyperaceae*) showed no germination differences between treatments (Figs 2 and 3 and S1 Table).

Interestingly, in our study the seed germination of cold-adapted chorotypes (Arctic-alpine, Circumboreal, Eurosiberian and Orophiitic, Endemic to the Northern Apennines) was significantly higher during autumn heat waves than the germination of widely distributed species (Subcosmopolitan and Eurasiatic). This difference suggests that varying environmental conditions experienced by the species in the past may have affected their germination responses. Assuming that selection pressure should favour individuals that decrease the probability of encountering unfavourable growth conditions following germination [63], we interpret such results as the consequence of the selective pressure exerted by cold winter temperatures on seedlings that emerged during mild autumns in widely-distributed species. In contrast, in cold environments where autumn is consistently cool, species may have not developed mechanisms to prevent seed germination during heat waves. Therefore, in a climatic scenario with increased frequency and intensity of heat waves, we would expect a strong selective pressure on cold adapted chorotypes.

In conclusion, our results suggest that short term periods of high temperatures, like heat waves, can enhance seed germination even immediately after seed dispersal and even under moderate drought. These results are based on lab simulations of air temperatures and thus there is still uncertainty about the temperatures that seeds may actually experience in the field. The response of seed germination to heat waves is species-specific. Consistent responses across chorotypes suggest that heat waves may have important consequences on seed germination and, in turn, selectively affect seedling recruitment. These differences may result in range shift and/or changes in local species dominance in montane and alpine plant communities and may have considerable effects on their genetic characteristics and adaptation potential.

## Supporting Information

**S1 Table. Results of generalized linear mixed effects models (GLMMs) on the effects of heat waves on seed germination of the tested species.**

(DOCX)

## Acknowledgments

The authors thank Dr. Paolo Cristofanelli (CNR-ISAC) who provided the climatic data from the Cimone Meteorological Station, and Giulia Zannella for her help during laboratory experiments. We also thank Charlotte Buckmaster for correcting the English manuscript.

## Author Contributions

Conceived and designed the experiments: SO TA AM GR. Performed the experiments: SO TA AM. Analyzed the data: CP. Contributed reagents/materials/analysis tools: MG PB GR. Wrote the paper: SO AM TA.

## References

1. IPCC. Climate Change 2013: The Physical Science Basis. Contribution of Working Group I to the Fifth Assessment Report of the Intergovernmental Panel on Climate Change. Cambridge University Press, Cambridge, United Kingdom and New York, NY, USA.
2. Easterling DR, Meehl GA, Parmesan C, Changnon SA, Karl TR, Mearns LO. Climate extremes: Observations, modeling, and impacts. *Science*. 2000; 289: 2068–2074. PMID: [11000103](#)
3. Orlovsky B, Seneviratne S. Global changes in extreme events: regional and seasonal dimension. *Climatic Change*. 2012; 110: 669–696.

4. Erlat E, Turkes M. Observed changes and trends in numbers of summer and tropical days, and the 2010 hot summer in Turkey. *Int J Clim*. 2013; 33: 1898–1908.
5. Elguindi N, Rauscher SA, Giorgi F. Historical and future changes in maximum and minimum temperature records over Europe. *Climatic Change*. 2013; 117: 415–431.
6. Smith M. An ecological perspective on extreme climatic events: a synthetic definition and framework to guide future research. *J Ecol*. 2011; 99: 656–663.
7. Niu S, Luo Y, Li D, Cao S, Xia J, Li J, Smith MD. 2014. Plant growth and mortality under climatic extremes: An overview. *Environ Exp Bot*. 2014; 98: 13–19.
8. Ciais P, Reichstein M, Viovy N, Granier A, Ogée J, Allard V, et al. Europe-wide reduction in primary productivity caused by the heat and drought in 2003. *Science*. 2005; 437: 529–533.
9. Abeli T, Mondoni A, Rossi G, Orsenigo S. Effect of summer heat-waves on Europe's wild flora and vegetation. *Agrochimica*. 2014; 58: 128–132.
10. Klein Tank AMG, Können GP. Trends in indices of daily temperature and precipitation extremes in Europe, 1946–1999. *J Climate*. 2003; 16: 3665–3680.
11. Ballester J, Rodó X, Giorgi F. Future changes in Central Europe heat waves expected to mostly follow summer mean warming. *Clim Dynam*. 2010; 35: 1191–1205.
12. Gill EC, Chase TN, Pielke RA Sr, Wolter K. Northern Hemisphere summer temperature and specific humidity anomalies from two reanalyses. *J Geophys Res*. 2013; 118: 8297–8305.
13. Trenberth KE, Shea DJ. Relationships between precipitation and surface temperature. *Geophys Res Lett*. 2005; 32: 14.
14. Peñuelas J, Prieto P, Beier C, Cesaraccio C, de Angelis P, de Dato G, et al. Response of plant species richness and primary productivity in shrublands along a north-south gradient in Europe to seven years of experimental warming and drought: reductions in primary productivity in the heat and drought year of 2003. *Glob Change Biol*. 2006; 13: 2563–2581.
15. Gerdol R, Bragazza L, Brancaloni L. Heatwave 2003: high summer temperature, rather than experimental fertilization, affects vegetation and carbon dioxide exchange in an alpine bog. *New Phytol*. 2008; 179: 142–154. doi: [10.1111/j.1469-8137.2008.02429.x](https://doi.org/10.1111/j.1469-8137.2008.02429.x) PMID: [18373651](https://pubmed.ncbi.nlm.nih.gov/18373651/)
16. De Boeck HJ, Dreesen FE, Janssens IA, Nijs I. Climatic characteristics of heat waves and their simulation in plant experiments. *Glob Change Biol*. 2010; 16: 1992–2000.
17. Christensen JH, Hewitson B, Busiuc A, Chen A, Gao X, Held I, et al. Regional Climate Projections. In: Solomon S, Qin D, Manning M, Chen Z, Marquis M, Averyt KB et al. eds. *Climate Change 2007: The Physical Science Basis. Contribution of Working Group I to the Fourth Assessment Report of the Intergovernmental Panel on Climate Change*. Cambridge University Press: Cambridge, UK, 2007; pp. 847–940.
18. Nogués-Bravo D, Araújo MB, Errea MP, Martínez-Rica JP. Exposure of global mountain systems to climate warming during the 21st Century. *Glob Env Change*. 2007; 17: 420–428.
19. Walther GR, Post E, Convey P, Menzel A, Parmesan C, Beebee TJC, et al. Ecological responses to recent climate change. *Nature*. 2002; 416: 389–395. PMID: [11919621](https://pubmed.ncbi.nlm.nih.gov/11919621/)
20. Sherry RA, Zhou X, Gu S, Arnone JA III, Schimel DS, Verburg PS, et al. Divergence of reproductive phenology under climate warming. *PNAS*. 2007; 104: 198–202. PMID: [17182748](https://pubmed.ncbi.nlm.nih.gov/17182748/)
21. Gottfried M, Pauli H, Futschik A, Akhalkatsi M, Barančok P, Benito Alonso JL, et al. Continent-wide response of mountain vegetation to climate change. *Nature Clim Change*. 2012; 2: 111–115.
22. Parolo G, Rossi G. Upward migration of vascular plants following a climate warming trends in the Alps. *Basic Appl Ecol*. 2008; 9: 100–107.
23. Pauli H, Gottfried M, Dullinger S, Abdaladze O, Akhalkatsi M, Benito Alonso JL, et al. Recent plant diversity changes on Europe's mountain summits. *Science*. 2012; 336: 353–355. doi: [10.1126/science.1219033](https://doi.org/10.1126/science.1219033) PMID: [22517860](https://pubmed.ncbi.nlm.nih.gov/22517860/)
24. Stanisci A, Frate L, Morra Di Cella U, Pelino G, Petey M, Siniscalco C, Carranza ML. Short-term signals of climate change in Italian summit vegetation: observations at two GLORIA sites. *Plant Biosyst*. 2015. doi: [10.1080/11263504.2014.968232](https://doi.org/10.1080/11263504.2014.968232)
25. Orsenigo S, Mondoni A, Rossi G, Abeli T. Some like it hot and some like it cold, but not too much: plant responses to climate extremes. *Plant Ecol*. 2014; 215: 677–688.
26. Abeli T, Rossi G, Gentili R, Gandini M, Mondoni A, Cristofanelli P. Effect of the extreme summer heat waves on isolated populations of two orophytic plants in the north Apennines (Italy). *Nordic J Bot*. 2012; 30: 109–115.
27. Gerdol R, Siffi C, Iacumin P, Gualmini M, Tomaselli M. Advanced snowmelt affects vegetative growth and sexual reproduction of *Vaccinium myrtillus* in a sub-alpine heath. *J Veg Sci*. 2013; 24: 569–579.

28. Bokhorst S, Bjerke JW, Street LE, Callaghan TV, Phoenix GK. Impacts of multiple extreme winter warming events on sub-arctic heathland: phenology, reproduction, growth and CO<sub>2</sub> flux responses. *Glob Change Biol.* 2011; 17: 2817–2830.
29. Bauweraerts I, Ameye M, Wertin TM, Mcguire MA, Teskey RO, Steppe K. Acclimation effects of heat waves and elevated CO<sub>2</sub> on gas exchange and chlorophyll fluorescence of northern red oak (*Quercus rubra* L.) seedlings. *Plant Ecol.* 2014; 215: 733–746.
30. Theurillat JP, Guisan A. Potential impact of climate change on vegetation in the European Alps: a review. *Climatic Change.* 2001; 50: 77–109.
31. Walck JL, Hidayati SN, Dixon KW, Thompson K, Poschlod P. Climate change and plant regeneration from seed. *Glob Change Biol.* 2011; 17: 2145–2161.
32. Baskin CC, Baskin JM. *Seeds: ecology, biogeography, and evolution of dormancy and germination.* 2nd Edition, Academic Press, San Diego, USA; 2014.
33. Milbau A, Graae BJ, Shevtsova A, Nijs I. Effects of a warmer climate on seed germination in the subarctic. *Ann Bot-London.* 2009; 104: 287–296.
34. Mondoni A, Rossi G, Orsenigo S, Probert RJ. Climate warming could shift the timing of seed germination in alpine plants. *Ann Bot-London.* 2012; 110: 155–164.
35. Ooi MKJ, Auld TD, Denham AJ. Projected soil temperature increase and seed dormancy response along an altitudinal gradient: implications for seed bank persistence under climate change. *Plant Soil.* 2012; 353: 289–303.
36. Hoyle GL, Venn SE, Steadman KJ, Good RB, McAuliffe EJ, Williams ER, Nicotra AB. Soil warming increases plant species richness but decreases germination from the alpine soil seed bank. *Glob Change Biol.* 2013; 19: 1549–1561.
37. Shevtsova A, Graae BJ, Jochum T, Milbau A, Kockelbergh F, Beyens L, Nijs I. Critical periods for impact of climate warming on early seedling establishment in subarctic tundra. *Glob Change Biol.* 2009; 15: 2662–2680.
38. Graae BJ, Ejmaes R, Marchand FL, Milbau A, Shevtsova A, Beyens L, Nijs I. The effect of an early-season short term heat pulse on plant recruitment in the Arctic. *Polar Biol.* 2009; 32: 1117–1126.
39. Mondoni A, Pedrini S, Bernareggi G, Rossi G, Abeli T, Probert R, Ghitti M, Bonomi C, Orsenigo S. Climate warming could increase the recruitment success in glacier foreland plants. *Ann Bot-London.* 2015; in press
40. Hay FR, Smith RD. Seed maturity: when to collect seeds from wild plants. In: Smith RD, Dickie JB, Linington SH, Pritchard HW, Probert RJ, eds. *Seed conservation: turning science into practice.* Royal Botanic Gardens, Kew, London. 2003; pp. 97–133.
41. Tomaselli M. The vegetation of summit rock faces, talus slope and grassland in the northern Apennines (N Italy). *Fitosociologia.* 1994; 26: 35–50.
42. Alessandrini A, Foggi B, Rossi G, Tomaselli M. *La flora di altitudine dell'Appennino Tosco-Emiliano.* Assessorato Agricoltura, Ambiente e Sviluppo, Bologna, Italy; 2003.
43. Passalacqua NG. On the definition of element, chorotype and component in biogeography. *J Biogeogr.* 2015; 42: 611–618.
44. Michel BE, Kauffmann MR. The osmotic potential of polyethylene glycol 6000. *Plant Physiol.* 1973; 51: 914–916. PMID: [16658439](#)
45. R Core Team. 2014. R: A language and environment for statistical computing. R Foundation for Statistical Computing, Vienna, Austria. Available: <http://www.R-project.org/>.
46. Hothorn T, Bretz F, Westfall P. Simultaneous inference in general parametric models. *Biometrical J.* 2008; 50: 346–363.
47. Körner C. *Alpine plant life: functional plant ecology of high mountain ecosystems,* 2nd ed. Springer, Heidelberg, Germany; 2003.
48. Schwienbacher E, Navarro-Cano JA, Neuner G, Erschbamer B. Seed dormancy in alpine species. *Flora.* 2011; 206: 845–856. PMID: [24415831](#)
49. Andrello M, Bizoux JP, Barbet-Massin M, Gaudeul M, Nicolè F, Till-Bottraud I. Effects of management regimes and extreme climatic events on plant population viability in *Eryngium alpinum*. *Biol Conserv.* 2012; 147: 99–106.
50. Marcante S, Sierra-Almeida A, Spindelböck JP, Erschbamer B, Neuner G. Frost as a limiting factor for recruitment and establishment of early development stages in an alpine glacier foreland? *J Veg Sci.* 2012; 23: 858–868.
51. Valt M, Cianfarra P. Recent snow cover variability in the Italian Alps. *Cold Reg Sci Technol.* 2010; 64: 146–157.



52. Schaberg PG, Hennon PE, D'Amore DV, Hawley GJ. Influence of simulated snow cover on the cold tolerance and freezing injury of yellow cedar seedlings. *Glob Change Biol.* 2008; 14: 1282–1293.
53. Larcher W, Kainmüller C, Wagner J. Survival types of high mountain plants under extreme temperatures. *Flora.* 2010; 205: 3–18.
54. Seneviratne SI, Corti T, Davin EL, Hirschi M, Jaeger EB, Lehner I, et al. Investigating soil moisture-climate interactions in a changing climate: A review. *Earth Sci.* 2010; 99: 125–161.
55. Evans CE, Etherington JR. The effect of soil water potential on seed germination of some British plants. *New Phytol.* 1990; 115: 539–548.
56. ARPA. Atlante idroclimatico dell'Emilia-Romagna 1961–2008. ARPA Servizio Idro-Meteo-Clima, Bologna, Italy; 2010
57. De Boeck HJ, Dreesen FE, Janssens IA, Nijs I. Whole system responses of experimental plant communities to climate extremes imposed in different seasons. *New Phytol.* 2011. 189: 806–817. doi: [10.1111/j.1469-8137.2010.03515.x](https://doi.org/10.1111/j.1469-8137.2010.03515.x) PMID: [21054412](https://pubmed.ncbi.nlm.nih.gov/21054412/)
58. Walker MD, Wahren CH, Hollister RD, Henry GHR, Ahlquist LE, Alatalo JM, et al. Plant community responses to experimental warming across the tundra biome. *PNAS.* 2006; 103: 1342–1346. PMID: [16428292](https://pubmed.ncbi.nlm.nih.gov/16428292/)
59. Buchner O, Neuner G. Variability of heat tolerance in alpine plant species measured at different altitudes. *Arc Antarc Alp Res.* 2003; 35: 411–420.
60. Marcante S, Erschbamer B, Buchner O, Neuner G. Impact of heat on early developmental stages of glacier foreland species. *Plant Ecol.* 2014; 215: 747–758. PMID: [26074725](https://pubmed.ncbi.nlm.nih.gov/26074725/)
61. Shaver GR, Giblin AE, Nadelhoffer KJ, Rastetter EB. Plant functional types and ecosystem change in arctic tundras. In: Smith TM, Shugart HH, Woodward FI, eds. *Plant Functional Types. Their Relevance to Ecosystem Properties and Global Change.* Cambridge, UK: Cambridge University Press. 1997; pp. 153–173.
62. Hamilton EW III, Heckathorn SA, Joshi P, Wang D, Barua D. Interactive effects of elevated CO<sub>2</sub> and growth temperature on the tolerance of photosynthesis to acute heat stress in C<sub>3</sub> and C<sub>4</sub> species. *Journal of Integrative Plant Biol.* 2008; 50: 1375–1387.
63. Probert RJ. The role of temperature in the regulation of seed dormancy and germination. In: Fenner M, ed. *Seeds. The ecology of regeneration in plant communities.* Oxon, UK CAB International. 2000; 261–292.
64. Conti F, Abbate G, Alessandrini A, Blasi C. An annotated checklist of the Italian vascular flora. Palombi Editori, Roma, Italy; 2005.
65. Peruzzi L. Checklist dei generi e delle famiglie della flora vascolare italiana. *Inf Bot Ital.* 2010; 42: 151–170.
